# Supplementary material for: Microfluidic Separation of Blood Cells Based on the Negative Dielectrophoresis Operated by Three Dimensional Microband Electrodes
Source: MDPI journal article supplement (doi:10.3390/mi11090833), 2020-08-31
Supplement: s1 [file s1]

Supplementary Material

# Microfluidic Separation of Blood Cells Based on the Negative Dielectrophoresis Operated by Three Dimensional Microband Electrodes

Tomoyuki Yasukawa Jyunko Yamada, Hitoshi Shiku, Tomokazu Matsue and Masato Suzuki

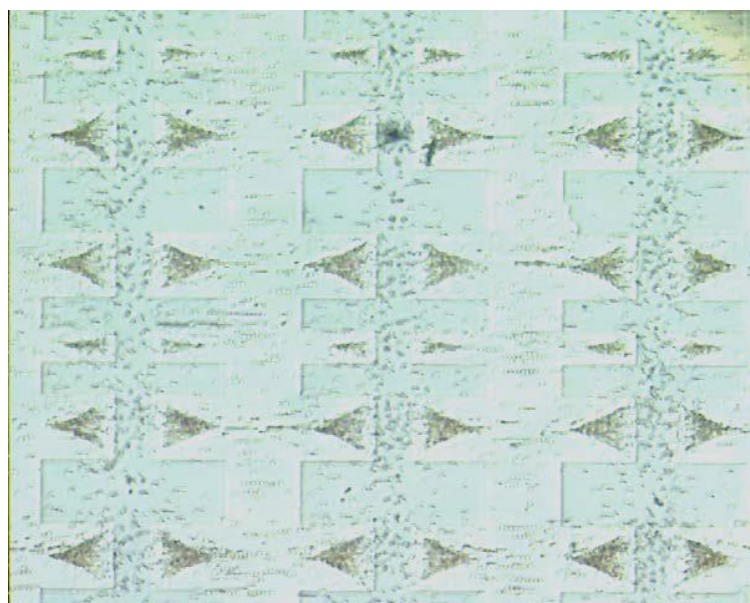

(A)

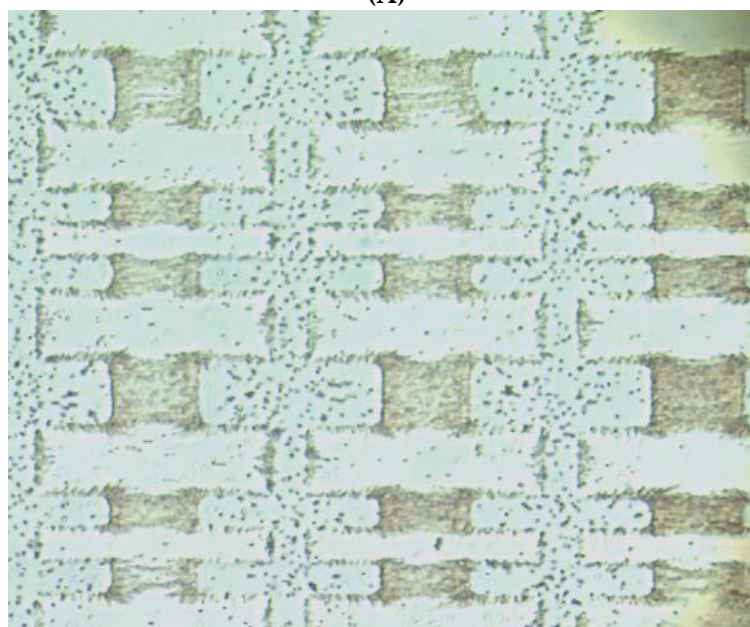

(B)

100  $\mu\text{m}$

**Figure S1.** (A) RBCs accumulated on the regions between the projecting parts in the single bands by n-DEP, and (B) RBCs accumulated on the regions between the projecting parts of neighbor bands by p-DEP.

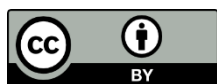

© 2020 by the authors. Submitted for possible open access publication under the terms and conditions of the Creative Commons Attribution (CC BY) license (<http://creativecommons.org/licenses/by/4.0/>).
